# Supplementary material
Source: PubMed Central journal article supplement (PMC9875724)
Supplement: ehp11155.s001.acco.pdf [file ehp11155.s001.acco.pdf]

**Note to readers with disabilities:** *EHP* strives to ensure that all journal content is accessible to all readers. However, some figures and Supplemental Material published in *EHP* articles may not conform to [508 standards](#) due to the complexity of the information being presented. If you need assistance accessing journal content, please contact [ehp508@niehs.nih.gov](mailto:ehp508@niehs.nih.gov). Our staff will work with you to assess and meet your accessibility needs within 3 working days.

### **Supplemental Material**

#### **Prenatal Exposure to PM<sub>2.5</sub> Oxidative Potential and Lung Function in Infants and Preschool- Age Children: A Prospective Study**

Anouk Marsal, Rémy Slama, Sarah Lyon-Caen, Lucille Joanna S. Borlaza, Jean-Luc Jaffrezo, Anne Boudier, Sophie Darfeuil, Rhabira Elazzouzi, Yoann Gioria, Johanna Lepeule, Ryan Chartier, Isabelle Pin, Joane Quentin, Sam Bayat, Gaëlle Uzu, Valérie Siroux, and the SEPAGES cohort study group

#### **Table of Contents**

**Table S1.** Description of covariates and child's characteristics in the group that have lung function measurements performed at 6 weeks (by the Nitrogen Multiple Breath Washout technique or by Tidal Breathing analysis) and in the group with lung function at 3 years (Forced Oscillation Technique).

**Table S2.** Monthly distribution of personal measurements of PM<sub>2.5</sub>, OP<sub>v</sub><sup>DTT</sup>, and OP<sub>v</sub><sup>AA</sup>.

**Table S3.** Comparison of the distribution of personal measurements of PM<sub>2.5</sub>, OP<sub>v</sub><sup>DTT</sup> and OP<sub>v</sub><sup>AA</sup> during each week of sampling, and their average.

**Table S4.** Sensitivity analyses of the associations between prenatal exposure to air pollution and lung function at 6 weeks. Regression coefficients are estimated from multiple linear models.

**Table S5.** Sensitivity analyses of the associations between prenatal exposure to air pollution and lung function at 3 years. Regression coefficients are estimated from multiple linear models.

**Table S6.** Results of the two-pollutant models for exposure to air pollution and lung function at 6 weeks.

**Table S7.** Results of the two-pollutant models for exposure to air pollution and lung function at 3 years.

**Figure S1.** Test of linearity of the PM<sub>2.5</sub>-lung function parameters at 6 weeks. Comparison of the adjusted linear model (red) and the adjusted model, modelling exposure as a natural spline with 5 degrees of freedom (blue dashed line), for exposure to PM<sub>2.5</sub> and lung function at 6 weeks. P-value is from the likelihood-ratio test. Summary table available in the Excel supplemental file. The green lines represent the thresholds for 1<sup>st</sup> and 99<sup>th</sup> percentile of outcome and exposure.

**Figure S2.** Test of linearity of the OP<sub>v</sub><sup>DTT</sup>-lung function parameters at 6 weeks. Comparison of the adjusted linear model (red) and the adjusted model, modelling exposure as a natural spline with 5 degrees of freedom (blue dashed line), for exposure to OP<sub>v</sub><sup>DTT</sup> and lung function at 6 weeks. P-value is from the likelihood-ratio test. Summary table available in the Excel supplemental file. The green lines represent the thresholds for 1<sup>st</sup> and 99<sup>th</sup> percentile of outcome and exposure.

**Figure S3.** Test of linearity of the OP<sub>v</sub><sup>AA</sup>-lung function parameters at 6 weeks. Comparison of the adjusted linear model (red) and the adjusted model, modelling exposure as a natural spline with 5 degrees of freedom (blue dashed line), for exposure to OP<sub>v</sub><sup>AA</sup> and lung function at 6 weeks. P-value is from the likelihood-ratio test. Summary table available in the Excel supplemental file. The green lines represent the thresholds for 1<sup>st</sup> and 99<sup>th</sup> percentile of outcome and exposure.

**Figure S4.** Test of linearity of the PM<sub>2.5</sub>-lung function parameters at 3 years. Comparison of the adjusted linear model (red) and the adjusted model, modelling exposure as a natural spline with 5 degrees of freedom (blue dashed line), for exposure to PM<sub>2.5</sub> and lung function at 3 years. P-value is from the likelihood-ratio test. Summary table available in the Excel supplemental file. The green lines represent the thresholds for 1<sup>st</sup> and 99<sup>th</sup> percentile of outcome and exposure.

**Figure S5.** Test of linearity of the OP<sub>v</sub><sup>DTT</sup>-lung function parameters at 3 years. Comparison of the adjusted linear model (red) and the adjusted model, modelling exposure as a natural spline with 5 degrees of freedom (blue dashed line), for exposure to OP<sub>v</sub><sup>DTT</sup> and lung function at 3 years. P-value is from the likelihood-ratio test. Summary table available in the Excel supplemental file. The green lines represent the thresholds for 1<sup>st</sup> and 99<sup>th</sup> percentile of outcome and exposure.

**Figure S6.** Test of linearity of the OP<sub>v</sub><sup>AA</sup>-lung function parameters at 3 years. Comparison of the adjusted linear model (red) and the adjusted model, modelling exposure as a natural spline with 5 degrees of freedom (blue dashed line), for exposure to OP<sub>v</sub><sup>AA</sup> and lung function at 3 years. P-value is from the likelihood-ratio test. Summary table available in the Excel supplemental file. The green lines represent the thresholds for 1<sup>st</sup> and 99<sup>th</sup> percentile of outcome and exposure.

**Figure S7.** Spearman correlation coefficients between the exposures. PM<sub>2.5</sub>, particulate matter with an aerodynamic diameter <2.5 μm; OP<sub>v</sub><sup>AA</sup>, volume-normalised oxidative potential measured by the AA assay; OP<sub>v</sub><sup>DTT</sup>, volume-normalised oxidative potential measured by the DTT assay.

**Figure S8.** Comparison of the distribution of personal measurements of  $OP_v^{AA}$  (left),  $OP_v^{DTT}$  (center) and  $PM_{2.5}$  (right) during each week of sampling, and their average. See Table S3 for corresponding numeric data. Note: Boxes represent 25th to 75th percentiles, the middle horizontal line represents the median, whiskers extend to the most extreme point within 1.5 interquartile ranges of the box and the dots outside boxes indicate outliers.  $PM_{2.5}$ , particulate matter with an aerodynamic diameter  $<2.5 \mu\text{m}$ ;  $OP_v^{AA}$ , volume-normalised oxidative potential measured by the AA assay;  $OP_v^{DTT}$ , volume-normalised oxidative potential measured by the DTT assay.

**Figure S9.** Effect of each confounder separately on the regression models at 6 weeks, adjusted for sex, height and weight, and comparison to the main model, adjusted on all the confounders listed. Outcomes and exposures were scaled by their IQR. See Excel supplemental file for corresponding numeric data. Whiskers represent the 95% confidence interval around the estimate.  $PM_{2.5}$ , particulate matter with an aerodynamic diameter  $<2.5 \mu\text{m}$  ( $\mu\text{g m}^{-3}$ );  $OP_v^{DTT}$ , volume-normalised oxidative potential measured by the DTT assay ( $\text{nmol min}^{-1} \text{m}^{-3}$ );  $OP_v^{AA}$ , volume-normalised oxidative potential measured by the AA assay ( $\text{nmol min}^{-1} \text{m}^{-3}$ ); FRC, functional residual capacity; LCI, lung clearance index;  $V_T$ , tidal volume;  $t_{PTEF/TE}$  ratio of time to peak tidal expiratory flow to expiratory time.

**Figure S10.** Effect of each confounder separately on the regression models at 3 years, adjusted for sex, height and weight, and comparison to the main model, adjusted on all the confounders listed. Outcomes and exposures were scaled by their IQR. See Table S3 for corresponding numeric data. Whiskers represent the 95% confidence interval around the estimate.  $PM_{2.5}$ , particulate matter with an aerodynamic diameter  $<2.5 \mu\text{m}$  ( $\mu\text{g m}^{-3}$ );  $OP_v^{DTT}$ , volume-normalised oxidative potential measured by the DTT assay ( $\text{nmol min}^{-1} \text{m}^{-3}$ );  $OP_v^{AA}$ , volume-normalised oxidative potential measured by the AA assay ( $\text{nmol min}^{-1} \text{m}^{-3}$ );  $Rrs_7$ , resistance at a frequency of 7 Hz;  $Rrs_{7-19}$ , difference between the resistance at 7 Hz and at 19 Hz;  $Xrs_7$ , reactance at a frequency of 7 Hz; AX, area under the reactance curve.

**Figure S11.** Association between personal exposure to  $PM_{2.5}$ ,  $OP_v^{DTT}$  and  $OP_v^{AA}$  during pregnancy and lung function parameters measured at 6 weeks in the multiple linear models and in the sensitivity analysis excluding leverage and influencing points, estimated by Cook's distance. Outcomes and exposures were scaled by their IQR. See Table S4 for corresponding numeric data. Whiskers represent the 95% confidence interval around the estimate. Models were adjusted on child's height, weight, sex, age, season of sampling, breastfeeding, environmental tobacco smoke, maternal age and BMI before pregnancy, parental level of education, parental history of rhinitis and mean temperature during pregnancy.  $PM_{2.5}$ , particulate matter with an aerodynamic diameter  $<2.5 \mu\text{m}$  ( $\mu\text{g m}^{-3}$ );  $OP_v^{DTT}$ , volume-normalised oxidative potential measured by the DTT assay ( $\text{nmol min}^{-1} \text{m}^{-3}$ );  $OP_v^{AA}$ , volume-normalised oxidative potential measured by the AA assay ( $\text{nmol min}^{-1} \text{m}^{-3}$ ); FRC, functional residual capacity; LCI, lung clearance index;  $V_T$ , tidal volume;  $t_{PTEF/TE}$  ratio of time to peak tidal expiratory flow to expiratory time.

**Figure S12.** Association between personal exposure to  $PM_{2.5}$ ,  $OP_v^{DTT}$  and  $OP_v^{AA}$  during pregnancy and lung function parameters measured at 3 years in the multiple linear models and in the sensitivity analysis excluding leverage and influencing points, estimated by Cook's distance. Outcomes and exposures were scaled by their IQR. See Table S5 for corresponding numeric data. Whiskers represent the 95% confidence interval around the estimate. Model were adjusted on child's height, weight, sex, age, season of sampling, breastfeeding, environmental tobacco smoke, maternal age and BMI before pregnancy, parental level of education, parental history of rhinitis and mean temperature during pregnancy.  $PM_{2.5}$ , particulate matter with an aerodynamic diameter  $<2.5 \mu m$  ( $\mu g m^{-3}$ );  $OP_v^{DTT}$ , volume-normalised oxidative potential measured by the DTT assay ( $nmol min^{-1} m^{-3}$ );  $OP_v^{AA}$ , volume-normalised oxidative potential measured by the AA assay ( $nmol min^{-1} m^{-3}$ );  $Rrs_7$ , resistance at a frequency of 7 Hz;  $Rrs_{7-19}$ , difference between the resistance at 7 Hz and at 19 Hz;  $Xrs_7$ , reactance at a frequency of 7 Hz;  $AX$ , area under the reactance curve.

**Additional File-** Excel Document

Table S1. Description of covariates and child's characteristics in the group that have lung function measurements performed at 6 weeks (by the Nitrogen Multiple Breath Washout technique or by Tidal Breathing analysis) and in the group with lung function at 3 years (Forced Oscillation Technique).

| Characteristics                               | Children with N <sub>2</sub> MBW at 6 weeks (median age: 47 days) N=325/356 | Children with AOS at 3 years (median age: 3.07 yrs.) N=248/356 |
|-----------------------------------------------|-----------------------------------------------------------------------------|----------------------------------------------------------------|
| <b>Sex of child</b>                           |                                                                             |                                                                |
| Male                                          | 172 (53%)                                                                   | 129 (52%)                                                      |
| Female                                        | 153 (47%)                                                                   | 119 (48%)                                                      |
| Missing                                       | /                                                                           | /                                                              |
| <b>Birthweight (g)</b>                        |                                                                             |                                                                |
| Median (IQR)                                  | 3280 (3040, 3560)                                                           | 3305 (3078, 3582)                                              |
| Missing                                       | /                                                                           | /                                                              |
| <b>Preterm birth, &lt;37 weeks</b>            | 14 (4.3%)                                                                   | 11 (4.4%)                                                      |
| Missing                                       | /                                                                           | /                                                              |
| <b>Parental educational level &gt;5 years</b> | 235 (72%)                                                                   | 187 (75%)                                                      |
| <b>Delivery mode</b>                          |                                                                             |                                                                |
| Vaginal                                       | 277 (85%)                                                                   | 207 (83%)                                                      |
| C-section                                     | 48 (15%)                                                                    | 41 (17%)                                                       |
| Missing                                       | /                                                                           | /                                                              |
| <b>Child still breastfed at 6 weeks</b>       | 281 (86%)                                                                   | 219 (88%)                                                      |
| Missing                                       | 1                                                                           | /                                                              |
| <b>Parental history of rhinitis</b>           | 186 (61%)                                                                   | 144 (61%)                                                      |
| Missing                                       | 21                                                                          | 12                                                             |
| <b>Parity</b>                                 |                                                                             |                                                                |
| 0 (nulliparous)                               | 145 (45%)                                                                   | 105 (42%)                                                      |
| 1 (primiparous)                               | 146 (45%)                                                                   | 119 (48%)                                                      |
| 2 or more (multiparous)                       | 34 (10%)                                                                    | 24 (9.7%)                                                      |
| <b>ETS in utero and &lt; 6 wks.</b>           |                                                                             |                                                                |
| 0                                             | 232 (71%)                                                                   | 178 (72%)                                                      |
| 1                                             | 93 (29%)                                                                    | 68 (28%)                                                       |
| Missing                                       | 0                                                                           | 2                                                              |
| <b>ETS &lt; 3 yrs.</b>                        |                                                                             |                                                                |
| 0                                             | 243 (78%)                                                                   | 195 (79%)                                                      |
| 1                                             | 69 (22%)                                                                    | 53 (21%)                                                       |
| Missing                                       | 13                                                                          | 0                                                              |
| <b>Maternal age at conception</b>             |                                                                             |                                                                |
| Median (IQR)                                  | 32 (30, 35)                                                                 | 32 (30, 35)                                                    |
| <b>Maternal BMI at conception</b>             |                                                                             |                                                                |
| Median (IQR)                                  | 21 (20, 24)                                                                 | 21 (20, 23)                                                    |
| <b>Season of sampling</b>                     |                                                                             |                                                                |
| Warm                                          | 112                                                                         | 96                                                             |
| Warm+Cold                                     | 133                                                                         | 90                                                             |
| Cold                                          | 80                                                                          | 62                                                             |
| <b>Mean temperature during pregnancy</b>      |                                                                             |                                                                |
| Median (IQR)                                  | 13.0 (10.5, 14.6)                                                           | 12.9 (10.5, 14.7)                                              |
| <b>Season at the clinical visit</b>           |                                                                             |                                                                |
| Fall                                          | 107                                                                         | 94                                                             |
| Spring                                        | 68                                                                          | 28                                                             |
| Summer                                        | 59                                                                          | 57                                                             |
| Winter                                        | 91                                                                          | 69                                                             |

Note: N<sub>2</sub>MBW, nitrogen multiple breath washout; TBFVL, tidal breathing flow-volume loops; AOS, airwave oscillometry; ETS, environmental tobacco smoke.

Table S2. Monthly distribution of personal measurements of  $PM_{2.5}$ ,  $OP_v^{DTT}$ , and  $OP_v^{AA}$ .

| Exposure                                                 | Statistics                  | Jan   | Feb   | Mar   | Apr   | May   | Jun   | Jul   | Aug   | Sep   | Oct   | Nov   | Dec   |
|----------------------------------------------------------|-----------------------------|-------|-------|-------|-------|-------|-------|-------|-------|-------|-------|-------|-------|
| $PM_{2.5}$<br>( $\mu\text{g m}^{-3}$ )                   | Minimum                     | 5.70  | 4.70  | 5.00  | 4.30  | 4.80  | 4.90  | 4.10  | 5.10  | 5.10  | 5.60  | 7.50  | 7.00  |
|                                                          | 25 <sup>th</sup> percentile | 10.17 | 9.95  | 10.65 | 8.10  | 9.58  | 9.60  | 9.30  | 8.92  | 10.50 | 10.80 | 12.52 | 15.23 |
|                                                          | Median                      | 14.40 | 13.30 | 13.00 | 9.70  | 12.75 | 12.60 | 11.90 | 12.20 | 13.20 | 13.80 | 17.65 | 19.50 |
|                                                          | 75 <sup>th</sup> percentile | 19.97 | 16.90 | 15.17 | 11.95 | 15.95 | 16.45 | 15.52 | 15.55 | 17.90 | 20.30 | 21.67 | 23.95 |
|                                                          | Maximum                     | 77.60 | 26.20 | 23.50 | 18.30 | 50.30 | 27.70 | 30.70 | 30.50 | 51.10 | 44.30 | 49.30 | 41.50 |
| $OP_v^{DTT}$<br>( $\text{nmol min}^{-1} \text{m}^{-3}$ ) | Minimum                     | 0.34  | 0.59  | 0.44  | 0.39  | 0.13  | 0.45  | 0.25  | 0.30  | 0.41  | 1.06  | 0.18  | 0.85  |
|                                                          | 25 <sup>th</sup> percentile | 1.08  | 0.85  | 1.10  | 0.84  | 1.02  | 1.11  | 0.94  | 0.78  | 0.89  | 1.52  | 1.46  | 1.69  |
|                                                          | Median                      | 1.51  | 1.34  | 1.56  | 1.07  | 1.27  | 1.45  | 1.18  | 1.03  | 1.34  | 1.91  | 1.98  | 2.71  |
|                                                          | 75 <sup>th</sup> percentile | 2.07  | 1.90  | 1.82  | 1.63  | 1.73  | 1.97  | 1.55  | 1.38  | 1.79  | 2.41  | 2.72  | 3.23  |
|                                                          | Maximum                     | 6.09  | 3.01  | 2.78  | 3.08  | 5.44  | 3.72  | 2.69  | 2.44  | 3.43  | 4.48  | 5.34  | 5.32  |
| $OP_v^{AA}$<br>( $\text{nmol min}^{-1} \text{m}^{-3}$ )  | Minimum                     | 0.40  | 0.58  | 0.77  | 0.28  | 0.34  | 0.36  | 0.04  | 0.07  | 0.18  | 0.90  | 0.13  | 1.08  |
|                                                          | 25 <sup>th</sup> percentile | 1.67  | 1.39  | 1.29  | 0.72  | 0.82  | 1.03  | 0.65  | 0.37  | 0.45  | 1.79  | 1.56  | 2.98  |
|                                                          | Median                      | 2.16  | 1.88  | 1.76  | 1.01  | 1.12  | 1.47  | 0.96  | 0.48  | 0.89  | 2.16  | 2.17  | 3.73  |
|                                                          | 75 <sup>th</sup> percentile | 3.34  | 2.56  | 2.07  | 1.27  | 1.67  | 1.78  | 1.46  | 0.60  | 1.12  | 2.71  | 3.16  | 4.53  |
|                                                          | Maximum                     | 11.43 | 5.57  | 3.51  | 7.55  | 5.58  | 5.75  | 3.75  | 2.04  | 3.99  | 3.48  | 8.42  | 6.09  |

Note:  $PM_{2.5}$ , particulate matter with an aerodynamic diameter  $<2.5 \mu\text{m}$ ;  $OP_v^{AA}$ , volume-normalised oxidative potential measured by the AA assay;  $OP_v^{DTT}$ , volume-normalised oxidative potential measured by the DTT assay.

Table S3. Comparison of the distribution of personal measurements of  $PM_{2.5}$ ,  $OP_v^{DTT}$  and  $OP_v^{AA}$  during each week of sampling, and their average.

| Exposure                                              | Trimester       | Minimum | 25 <sup>th</sup> percentile | Median | 75 <sup>th</sup> percentile | Maximum |
|-------------------------------------------------------|-----------------|---------|-----------------------------|--------|-----------------------------|---------|
| $PM_{2.5}$ ( $\mu\text{g m}^{-3}$ )                   | early pregnancy | 4.30    | 9.70                        | 13.85  | 18.85                       | 51.10   |
|                                                       | late pregnancy  | 4.20    | 9.78                        | 12.75  | 17.32                       | 77.60   |
|                                                       | average         | 5.25    | 11.36                       | 13.75  | 17.46                       | 46.70   |
| $OP_v^{DTT}$ ( $\text{nmol min}^{-1} \text{m}^{-3}$ ) | early pregnancy | 0.18    | 1.05                        | 1.46   | 1.97                        | 4.22    |
|                                                       | late pregnancy  | 0.13    | 1.01                        | 1.44   | 2.08                        | 6.09    |
|                                                       | average         | 0.57    | 1.17                        | 1.52   | 2.00                        | 3.79    |
| $OP_v^{AA}$ ( $\text{nmol min}^{-1} \text{m}^{-3}$ )  | early pregnancy | 0.04    | 0.83                        | 1.52   | 2.19                        | 11.43   |
|                                                       | late pregnancy  | 0.07    | 0.87                        | 1.48   | 2.33                        | 7.86    |
|                                                       | average         | 0.27    | 1.17                        | 1.61   | 2.22                        | 6.60    |

Note:  $PM_{2.5}$ , particulate matter with an aerodynamic diameter  $<2.5 \mu\text{m}$ ;  $OP_v^{AA}$ , volume-normalised oxidative potential measured by the AA assay;  $OP_v^{DTT}$ , volume-normalised oxidative potential measured by the DTT assay.

Table S4. Sensitivity analyses of the associations between prenatal exposure to air pollution and lung function at 6 weeks. Regression coefficients are estimated from multiple linear models.

| Pollutants                                                               | Regression model                          | FRC (mL)              |     | LCI                   |     | V <sub>T</sub> (mL)   |     | t <sub>PTEF/TE</sub> (%) |     |
|--------------------------------------------------------------------------|-------------------------------------------|-----------------------|-----|-----------------------|-----|-----------------------|-----|--------------------------|-----|
|                                                                          |                                           | Coefficients (95% CI) | N   | Coefficients (95% CI) | N   | Coefficients (95% CI) | N   | Coefficients (95% CI)    | N   |
| PM <sub>2.5</sub> (µg m <sup>-3</sup> )                                  | Complete Cases                            | -1.54 (-3.69, 0.60)   | 262 | -0.01 (-0.15, 0.13)   | 262 | -0.66 (-1.51, 0.19)   | 285 | 0.30 (-0.99, 1.59)       | 285 |
|                                                                          | Main model                                | -1.58 (-3.67, 0.50)   | 284 | -0.01 (-0.14, 0.13)   | 284 | -0.54 (-1.35, 0.28)   | 309 | 0.25 (-1.02, 1.51)       | 309 |
|                                                                          | 2 sampling periods                        | -1.58 (-4.23, 1.07)   | 178 | -0.01 (-0.20, 0.17)   | 178 | -0.64 (-1.74, 0.45)   | 204 | 0.11 (-1.67, 1.89)       | 204 |
|                                                                          | Excluding extreme values                  | -0.71 (-2.96, 1.53)   | 270 | 0.05 (-0.10, 0.20)    | 271 | 0.03 (-0.89, 0.95)    | 293 | 0.00 (-1.34, 1.34)       | 293 |
|                                                                          | Adjusted on NO <sub>2</sub>               | -1.56 (-3.67, 0.55)   | 284 | -0.02 (-0.15, 0.12)   | 284 | 0.31 (-0.96, 1.59)    | 309 | -0.56 (-1.39, 0.27)      | 309 |
|                                                                          | Cook's distance                           | -1.97 (-3.56, -0.38)  | 266 | 0.04 (-0.08, 0.16)    | 262 | -0.22 (-0.97, 0.53)   | 290 | -0.5 (-1.6, 0.59)        | 295 |
|                                                                          | Excluding high degrees of hypoventilation | -1.09 (-3.45, 1.27)   | 212 | 0.04 (-0.12, 0.20)    | 212 | /                     | /   | /                        | /   |
| OP <sub>v</sub> <sup>DTT</sup> (nmol min <sup>-1</sup> m <sup>-3</sup> ) | Complete Cases                            | -2.65 (-5.16, -0.14)  | 262 | -0.06 (-0.22, 0.10)   | 262 | -0.64 (-1.66, 0.37)   | 285 | 0.71 (-0.84, 2.25)       | 285 |
|                                                                          | Main model                                | -2.26 (-4.68, 0.15)   | 284 | -0.06 (-0.22, 0.09)   | 284 | -0.58 (-1.54, 0.38)   | 309 | 0.69 (-0.79, 2.17)       | 309 |
|                                                                          | 2 sampling periods                        | -2.15 (-5.60, 1.30)   | 178 | 0.03 (-0.21, 0.27)    | 178 | -0.83 (-2.22, 0.55)   | 204 | 0.51 (-1.74, 2.76)       | 204 |
|                                                                          | Excluding extreme values                  | -1.8 (-4.16, 0.56)    | 272 | -0.02 (-0.19, 0.14)   | 272 | -0.03 (-1.02, 0.96)   | 296 | 0.68 (-0.78, 2.15)       | 296 |
|                                                                          | Adjusted on NO <sub>2</sub>               | -2.24 (-4.67, 0.19)   | 284 | -0.07 (-0.23, 0.09)   | 284 | -0.60 (-1.57, 0.37)   | 309 | 0.75 (-0.74, 2.24)       | 309 |
|                                                                          | Cook's distance                           | -2.19 (-4.11, -0.27)  | 263 | -0.06 (-0.20, 0.08)   | 263 | -0.37 (-1.24, 0.49)   | 291 | 0.61 (-0.66, 1.87)       | 296 |
|                                                                          | Excluding high degrees of hypoventilation | -1.91 (-4.49, 0.68)   | 212 | -0.03 (-0.20, 0.15)   | 212 | /                     | /   | /                        | /   |
| OP <sub>v</sub> <sup>AA</sup> (nmol min <sup>-1</sup> m <sup>-3</sup> )  | Complete Cases                            | -0.70 (-3.03, 1.63)   | 262 | -0.06 (-0.21, 0.09)   | 262 | 0.09 (-0.83, 1.02)    | 285 | 0.13 (-1.27, 1.54)       | 285 |
|                                                                          | Main model                                | -0.59 (-2.85, 1.68)   | 284 | -0.05 (-0.19, 0.10)   | 284 | 0.13 (-0.76, 1.02)    | 309 | 0.14 (-1.23, 1.51)       | 309 |
|                                                                          | 2 sampling periods                        | -1.24 (-4.33, 1.84)   | 178 | 0.01 (-0.21, 0.23)    | 178 | -0.31 (-1.58, 0.95)   | 204 | -0.34 (-2.39, 1.72)      | 204 |
|                                                                          | Excluding extreme values                  | 0.73 (-1.83, 3.28)    | 271 | 0.01 (-0.16, 0.18)    | 271 | 0.84 (-0.18, 1.85)    | 295 | -0.53 (-2.06, 1.00)      | 294 |
|                                                                          | Adjusted on NO <sub>2</sub>               | -0.55 (-2.83, 1.72)   | 284 | -0.05 (-0.20, 0.09)   | 284 | 0.12 (-0.77, 1.01)    | 309 | 0.18 (-1.20, 1.55)       | 309 |
|                                                                          | Cook's distance                           | -0.43 (-2.35, 1.48)   | 266 | -0.03 (-0.17, 0.10)   | 265 | 0.59 (-0.24, 1.43)    | 292 | 0.25 (-0.97, 1.46)       | 296 |
|                                                                          | Excluding high degrees of hypoventilation | -0.92 (-3.19, 1.34)   | 212 | -0.06 (-0.21, 0.09)   | 212 | /                     | /   | /                        | /   |

Note: Coefficients are calculated for an increase of one IQR for PM<sub>2.5</sub>, OP<sub>v</sub><sup>DTT</sup> and OP<sub>v</sub><sup>AA</sup>, corresponding to 6.9 µg m<sup>-3</sup>, 0.89 nmol min<sup>-1</sup> m<sup>-3</sup>, and 1.14 nmol min<sup>-1</sup> m<sup>-3</sup>, respectively. FRC, functional residual capacity; LCI, lung clearance index; V<sub>T</sub>, tidal volume; t<sub>PTEF/TE</sub> ratio of time to peak tidal expiratory flow to expiratory time; PM<sub>2.5</sub>, particulate matter with an aerodynamic diameter <2.5 µm; OP<sub>v</sub><sup>AA</sup>, volume-normalised oxidative potential measured by the AA assay; OP<sub>v</sub><sup>DTT</sup>, volume-normalised oxidative potential measured by the DTT assay.

Table S5. Sensitivity analyses of the associations between prenatal exposure to air pollution and lung function at 3 years. Regression coefficients are estimated from multiple linear models.

| Pollutants                                                               | Regression model            | Rrs <sub>7</sub> (hPa.s/L) |     | Rrs <sub>7-19</sub> (hPa.s/L) |     | Xrs <sub>7</sub> (hPa.s/L) |     | AX (hPa/L)            |     |
|--------------------------------------------------------------------------|-----------------------------|----------------------------|-----|-------------------------------|-----|----------------------------|-----|-----------------------|-----|
|                                                                          |                             | Coefficients (95% CI)      | N   | Coefficients (95% CI)         | N   | Coefficients (95% CI)      | N   | Coefficients (95% CI) | N   |
| PM <sub>2.5</sub> (µg m <sup>-3</sup> )                                  | Complete Cases              | -0.01 (-0.33, 0.31)        | 235 | 0.02 (-0.13, 0.17)            | 235 | 0.01 (-0.15, 0.18)         | 235 | 0.36 (-4.82, 5.53)    | 235 |
|                                                                          | Main model                  | -0.02 (-0.33, 0.30)        | 248 | 0.02 (-0.13, 0.16)            | 248 | 0.01 (-0.15, 0.17)         | 248 | 0.22 (-4.81, 5.25)    | 248 |
|                                                                          | 2 sampling periods          | 0.1 (-0.35, 0.55)          | 151 | 0.05 (-0.17, 0.26)            | 151 | -0.01 (-0.24, 0.22)        | 151 | 1.62 (-5.42, 8.66)    | 151 |
|                                                                          | Excluding extreme values    | -0.01 (-0.32, 0.29)        | 238 | 0.04 (-0.1, 0.18)             | 239 | -0.02 (-0.18, 0.14)        | 238 | -1.05 (-6.03, 3.92)   | 238 |
|                                                                          | Adjusted on NO <sub>2</sub> | 0.03 (-0.29, 0.35)         | 248 | 0.04 (-0.11, 0.18)            | 248 | 0.00 (-0.16, 0.16)         | 248 | 1.03 (-4.03, 6.09)    | 248 |
|                                                                          | Cook's distance             | -0.07 (-0.35, 0.21)        | 232 | 0.04 (-0.07, 0.16)            | 233 | -0.05 (-0.17, 0.08)        | 235 | -0.50 (-4.81, 3.80)   | 237 |
| OP <sub>v</sub> <sup>DTT</sup> (nmol min <sup>-1</sup> m <sup>-3</sup> ) | Complete Cases              | 0.03 (-0.3, 0.36)          | 235 | 0.09 (-0.06, 0.25)            | 235 | -0.06 (-0.22, 0.11)        | 235 | 0.99 (-4.38, 6.35)    | 235 |
|                                                                          | Main model                  | 0.05 (-0.28, 0.37)         | 248 | 0.09 (-0.06, 0.24)            | 248 | -0.05 (-0.22, 0.11)        | 248 | 1.07 (-4.08, 6.22)    | 248 |
|                                                                          | 2 sampling periods          | 0.19 (-0.36, 0.74)         | 151 | 0.12 (-0.14, 0.38)            | 151 | -0.13 (-0.41, 0.15)        | 151 | 1.48 (-7.15, 10.11)   | 151 |
|                                                                          | Excluding extreme values    | 0.1 (-0.25, 0.45)          | 235 | 0.20 (0.04, 0.36)             | 235 | -0.10 (-0.28, 0.08)        | 236 | 0.14 (-5.53, 5.81)    | 235 |
|                                                                          | Adjusted on NO <sub>2</sub> | 0.06 (-0.26, 0.39)         | 248 | 0.10 (-0.05, 0.25)            | 248 | -0.06 (-0.22, 0.10)        | 248 | 1.33 (-3.78, 6.45)    | 248 |
|                                                                          | Cook's distance             | 0.15 (-0.13, 0.43)         | 233 | 0.16 (0.04, 0.29)             | 233 | -0.09 (-0.21, 0.04)        | 235 | 0.38 (-4.04, 4.8)     | 237 |
| OP <sub>v</sub> <sup>AA</sup> (nmol min <sup>-1</sup> m <sup>-3</sup> )  | Complete Cases              | -0.12 (-0.46, 0.22)        | 235 | 0.12 (-0.04, 0.27)            | 235 | -0.06 (-0.23, 0.11)        | 235 | -2.35 (-7.78, 3.07)   | 235 |
|                                                                          | Main model                  | -0.08 (-0.41, 0.25)        | 248 | 0.12 (-0.04, 0.27)            | 248 | -0.07 (-0.23, 0.10)        | 248 | -2.21 (-7.48, 3.07)   | 248 |
|                                                                          | 2 sampling periods          | 0.23 (-0.29, 0.75)         | 151 | 0.25 (0, 0.49)                | 151 | -0.25 (-0.52, 0.01)        | 151 | 0.87 (-7.33, 9.06)    | 151 |
|                                                                          | Excluding extreme values    | 0.03 (-0.33, 0.4)          | 238 | 0.16 (-0.02, 0.33)            | 237 | -0.03 (-0.22, 0.16)        | 237 | -4.28 (-10.19, 1.63)  | 237 |
|                                                                          | Adjusted on NO <sub>2</sub> | -0.08 (-0.41, 0.25)        | 248 | 0.12 (-0.03, 0.27)            | 248 | -0.07 (-0.23, 0.10)        | 248 | -2.16 (-7.39, 3.07)   | 248 |
|                                                                          | Cook's distance             | 0.01 (-0.28, 0.29)         | 233 | 0.17 (0.05, 0.29)             | 234 | -0.1 (-0.23, 0.03)         | 235 | -3.55 (-8.54, 1.44)   | 236 |

Note: Coefficients are calculated for an increase of one IQR for PM<sub>2.5</sub>, OP<sub>v</sub><sup>DTT</sup> and OP<sub>v</sub><sup>AA</sup>, corresponding to 6.9 µg m<sup>-3</sup>, 0.89 nmol min<sup>-1</sup> m<sup>-3</sup>, and 1.14 nmol min<sup>-1</sup> m<sup>-3</sup>, respectively. PM<sub>2.5</sub>, particulate matter with an aerodynamic diameter <2.5 µm; OP<sub>v</sub><sup>AA</sup>, volume-normalised oxidative potential measured by the AA assay; OP<sub>v</sub><sup>DTT</sup>, volume-normalised oxidative potential measured by the DTT assay; Rrs<sub>7</sub>, resistance at a frequency of 7 Hz; Rrs<sub>7-19</sub>, difference between the resistance at 7 Hz and at 19 Hz; Xrs<sub>7</sub>, reactance at a frequency of 7 Hz; AX, area under the reactance curve.



Table S6. Results of the two-pollutant models for exposure to air pollution and lung function at 6 weeks.

|                                           | Single-pollutant model<br>Coefficients (95% CI) <sup>1</sup> | Two-pollutant model (adjusted for exposures below)      |                                                                      |                                                                     |
|-------------------------------------------|--------------------------------------------------------------|---------------------------------------------------------|----------------------------------------------------------------------|---------------------------------------------------------------------|
|                                           |                                                              | PM <sub>2.5</sub><br>Coefficients (95% CI) <sup>1</sup> | OP <sub>v</sub> <sup>DTT</sup><br>Coefficients (95% CI) <sup>1</sup> | OP <sub>v</sub> <sup>AA</sup><br>Coefficients (95% CI) <sup>1</sup> |
| <b>FRC (mL)</b>                           |                                                              |                                                         |                                                                      |                                                                     |
| PM <sub>2.5</sub>                         | -1.58 (-3.67, 0.50)                                          | --                                                      | -0.59 (-3.37, 2.19)                                                  | -1.74 (-4.10, 0.62)                                                 |
| OP <sub>v</sub> <sup>DTT</sup>            | -2.26 (-4.68, 0.15)                                          | -1.82 (-5.03, 1.40)                                     | --                                                                   | --                                                                  |
| OP <sub>v</sub> <sup>AA</sup>             | -0.59 (-2.85, 1.68)                                          | 0.27 (-2.27, 2.81)                                      | --                                                                   | --                                                                  |
| <b>LCI</b>                                |                                                              |                                                         |                                                                      |                                                                     |
| PM <sub>2.5</sub>                         | -0.01 (-0.14, 0.13)                                          | --                                                      | 0.03 (-0.15, 0.21)                                                   | 0.00 (-0.15, 0.15)                                                  |
| OP <sub>v</sub> <sup>DTT</sup>            | -0.06 (-0.22, 0.09)                                          | -0.09 (-0.29, 0.12)                                     | --                                                                   | --                                                                  |
| OP <sub>v</sub> <sup>AA</sup>             | -0.05 (-0.19, 0.10)                                          | -0.05 (-0.21, 0.12)                                     | --                                                                   | --                                                                  |
| <b>V<sub>T</sub> (mL)</b>                 |                                                              |                                                         |                                                                      |                                                                     |
| PM <sub>2.5</sub>                         | -0.54 (-1.35, 0.28)                                          | --                                                      | -0.22 (-1.29, 0.86)                                                  | -0.62 (-1.53, 0.29)                                                 |
| OP <sub>v</sub> <sup>DTT</sup>            | -0.58 (-1.54, 0.38)                                          | -0.41 (-1.67, 0.85)                                     | --                                                                   | --                                                                  |
| OP <sub>v</sub> <sup>AA</sup>             | 0.13 (-0.76, 1.02)                                           | 0.43 (-0.56, 1.41)                                      | --                                                                   | --                                                                  |
| <b>t<sub>PTEF</sub>/t<sub>E</sub> (%)</b> |                                                              |                                                         |                                                                      |                                                                     |
| PM <sub>2.5</sub>                         | 0.25 (-1.02, 1.51)                                           | --                                                      | -0.19 (-1.85, 1.47)                                                  | 0.27 (-1.14, 1.68)                                                  |
| OP <sub>v</sub> <sup>DTT</sup>            | 0.69 (-0.79, 2.17)                                           | 0.83 (-1.11, 2.78)                                      | --                                                                   | --                                                                  |
| OP <sub>v</sub> <sup>AA</sup>             | 0.14 (-1.23, 1.51)                                           | 0.01 (-1.51, 1.54)                                      | --                                                                   | --                                                                  |

Note: Coefficients are calculated for an increase of one IQR for PM<sub>2.5</sub>, OP<sub>v</sub><sup>DTT</sup> and OP<sub>v</sub><sup>AA</sup>, corresponding to 6.9 μg m<sup>-3</sup>, 0.89 nmol min<sup>-1</sup> m<sup>-3</sup>, and 1.14 nmol min<sup>-1</sup> m<sup>-3</sup>, respectively. PM<sub>2.5</sub>, particulate matter with an aerodynamic diameter <2.5 μm; OP<sub>v</sub><sup>AA</sup>, volume-normalised oxidative potential measured by the AA assay; OP<sub>v</sub><sup>DTT</sup>, volume-normalised oxidative potential measured by the DTT assay; FRC, functional residual capacity; LCI, lung clearance index; V<sub>T</sub>, tidal volume; t<sub>PTEF</sub>/t<sub>E</sub> ratio of time to peak tidal expiratory flow to expiratory time.

<sup>1</sup>adjusted on child's height, weight, sex, age, season of sampling, breastfeeding, environmental tobacco smoke, maternal age and BMI before pregnancy, parental level of education, parental history of rhinitis and mean temperature during pregnancy.

Table S7. Results of the two-pollutant models for exposure to air pollution and lung function at 3 years.

|                                     | Single-pollutant model<br>Coefficients (95% CI) <sup>1</sup> | Two-pollutant model (adjusted for exposures below)      |                                                                      |                                                                     |
|-------------------------------------|--------------------------------------------------------------|---------------------------------------------------------|----------------------------------------------------------------------|---------------------------------------------------------------------|
|                                     |                                                              | PM <sub>2.5</sub><br>Coefficients (95% CI) <sup>1</sup> | OP <sub>v</sub> <sup>DTT</sup><br>Coefficients (95% CI) <sup>1</sup> | OP <sub>v</sub> <sup>AA</sup><br>Coefficients (95% CI) <sup>1</sup> |
| <b>Rrs<sub>7</sub> (hPa.s/L)</b>    |                                                              |                                                         |                                                                      |                                                                     |
| PM <sub>2.5</sub>                   | -0.02 (-0.33, 0.30)                                          | --                                                      | -0.12 (-0.54, 0.30)                                                  | 0.00 (-0.36, 0.37)                                                  |
| OP <sub>v</sub> <sup>DTT</sup>      | 0.05 (-0.28, 0.37)                                           | 0.13 (-0.3, 0.56)                                       | --                                                                   | --                                                                  |
| OP <sub>v</sub> <sup>AA</sup>       | -0.08 (-0.41, 0.25)                                          | -0.08 (-0.46, 0.30)                                     | --                                                                   | --                                                                  |
| <b>Rrs<sub>7-19</sub> (hPa.s/L)</b> |                                                              |                                                         |                                                                      |                                                                     |
| PM <sub>2.5</sub>                   | 0.02 (-0.13, 0.16)                                           | --                                                      | -0.07 (-0.27, 0.13)                                                  | -0.05 (-0.22, 0.12)                                                 |
| OP <sub>v</sub> <sup>DTT</sup>      | 0.09 (-0.06, 0.24)                                           | 0.14 (-0.06, 0.34)                                      | --                                                                   | --                                                                  |
| OP <sub>v</sub> <sup>AA</sup>       | 0.12 (-0.04, 0.27)                                           | 0.15 (-0.03, 0.33)                                      | --                                                                   | --                                                                  |
| <b>Xrs<sub>7</sub> (hPa.s/L)</b>    |                                                              |                                                         |                                                                      |                                                                     |
| PM <sub>2.5</sub>                   | 0.01 (-0.15, 0.17)                                           | --                                                      | 0.08 (-0.13, 0.29)                                                   | 0.06 (-0.13, 0.24)                                                  |
| OP <sub>v</sub> <sup>DTT</sup>      | -0.05 (-0.22, 0.11)                                          | -0.11 (-0.32, 0.11)                                     | --                                                                   | --                                                                  |
| OP <sub>v</sub> <sup>AA</sup>       | -0.07 (-0.23, 0.10)                                          | -0.10 (-0.29, 0.10)                                     | --                                                                   | --                                                                  |
| <b>AX (hPa/L)</b>                   |                                                              |                                                         |                                                                      |                                                                     |
| PM <sub>2.5</sub>                   | 0.22 (-4.81, 5.25)                                           | --                                                      | -1.58 (-8.27, 5.10)                                                  | 1.12 (-4.72, 6.96)                                                  |
| OP <sub>v</sub> <sup>DTT</sup>      | 1.07 (-4.08, 6.22)                                           | 2.13 (-4.71, 8.96)                                      | --                                                                   | --                                                                  |
| OP <sub>v</sub> <sup>AA</sup>       | -2.21 (-7.48, 3.07)                                          | -2.80 (-8.91, 3.32)                                     | --                                                                   | --                                                                  |

Note: Coefficients are calculated for an increase of one IQR for PM<sub>2.5</sub>, OP<sub>v</sub><sup>DTT</sup> and OP<sub>v</sub><sup>AA</sup>, corresponding to 6.9 μg m<sup>-3</sup>, 0.89 nmol min<sup>-1</sup> m<sup>-3</sup>, and 1.14 nmol min<sup>-1</sup> m<sup>-3</sup>, respectively. PM<sub>2.5</sub>, particulate matter with an aerodynamic diameter <2.5 μm; OP<sub>v</sub><sup>AA</sup>, volume-normalised oxidative potential measured by the AA assay; OP<sub>v</sub><sup>DTT</sup>, volume-normalised oxidative potential measured by the DTT assay; Rrs<sub>7</sub>, resistance at a frequency of 7 Hz; Rrs<sub>7-19</sub>, difference between the resistance at 7 Hz and at 19 Hz; Xrs<sub>7</sub>, reactance at a frequency of 7 Hz; AX, area under the reactance curve.

<sup>1</sup>adjusted on child's height, weight, sex, age, season of sampling, breastfeeding, environmental tobacco smoke, maternal age and BMI before pregnancy, parental level of education, parental history of rhinitis and mean temperature during pregnancy.

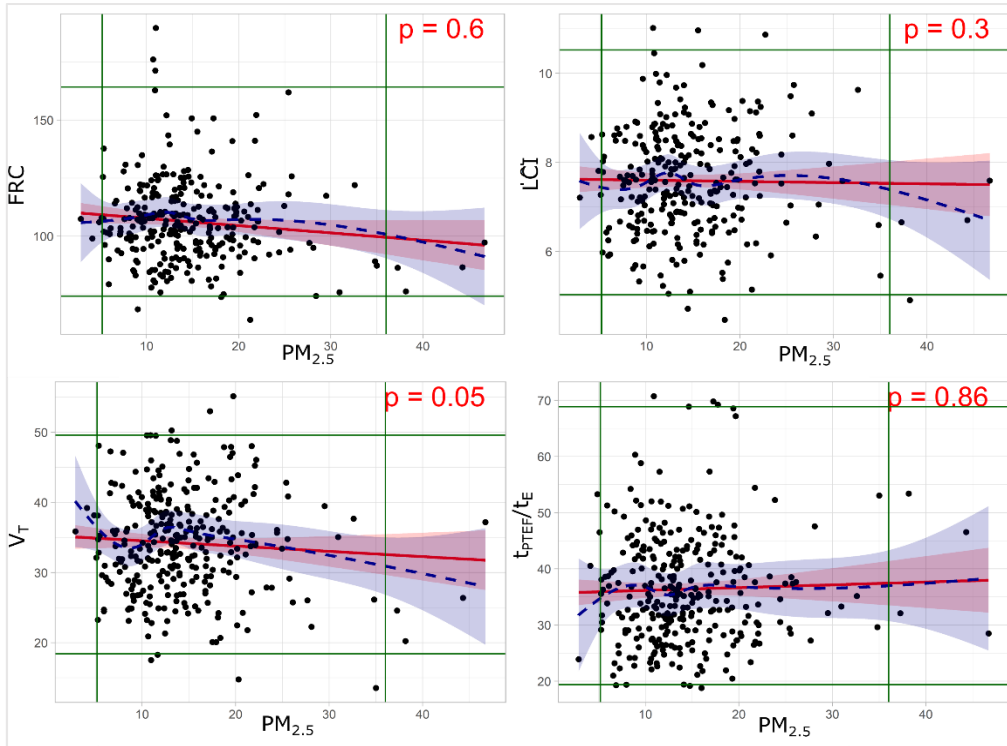

Figure S1. Test of linearity of the  $PM_{2.5}$ -lung function parameters at 6 weeks. Comparison of the adjusted linear model (red) and the adjusted model, modelling exposure as a natural spline with 5 degrees of freedom (blue dashed line), for exposure to  $PM_{2.5}$  and lung function at 6 weeks. P-value is from the likelihood-ratio test. Summary table available in the Excel supplemental file. The green lines represent the thresholds for 1<sup>st</sup> and 99<sup>th</sup> percentile of outcome and exposure.

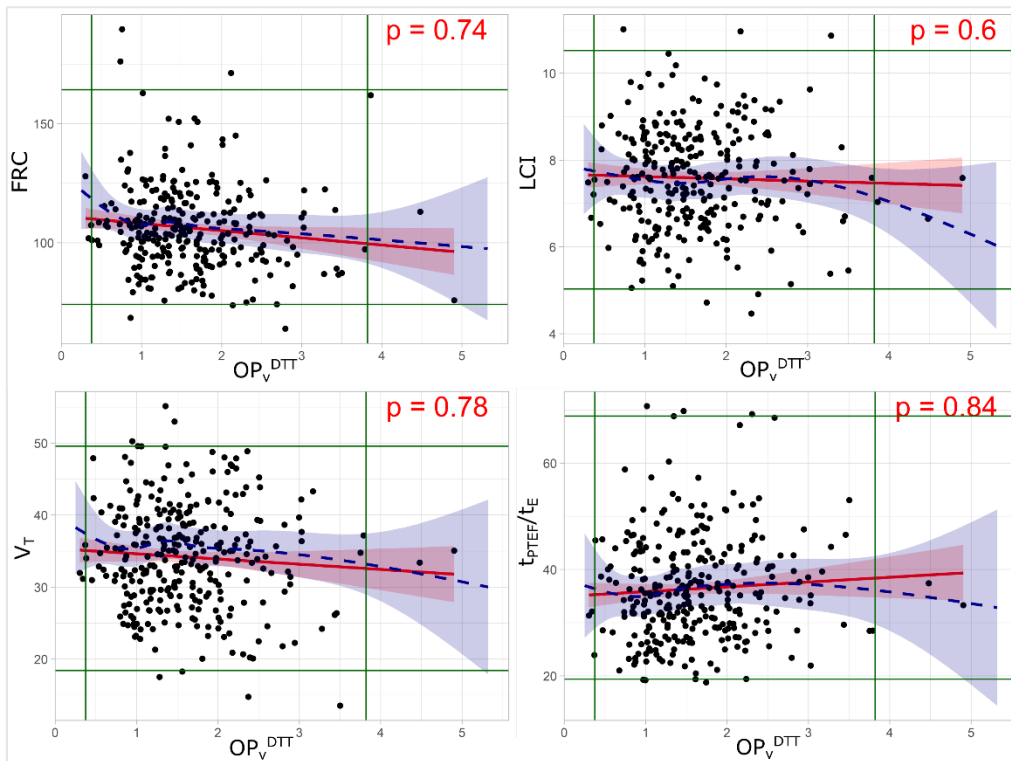

Figure S2. Test of linearity of the  $OP_v^{DTT}$ -lung function parameters at 6 weeks. Comparison of the adjusted linear model (red) and the adjusted model, modelling exposure as a natural spline with 5 degrees of freedom (blue dashed line), for exposure to  $OP_v^{DTT}$  and lung function at 6 weeks. P-value is from the likelihood-ratio test. Summary table available in the Excel supplemental file. The green lines represent the thresholds for 1<sup>st</sup> and 99<sup>th</sup> percentile of outcome and exposure.

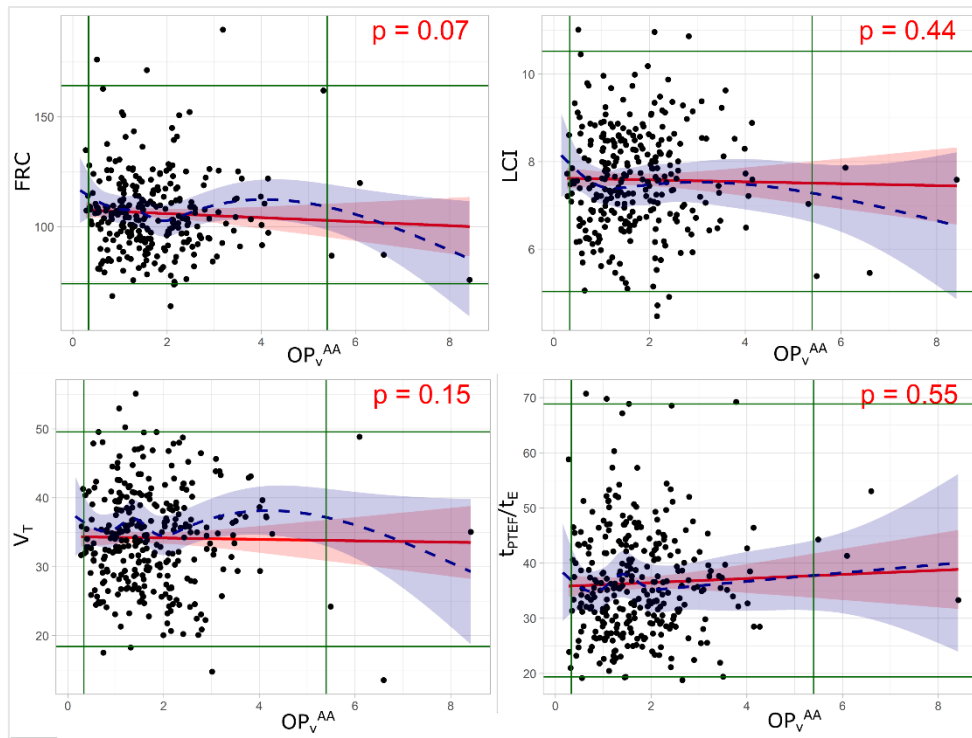

Figure S3. Test of linearity of the  $OP_v^{AA}$ -lung function parameters at 6 weeks.

Comparison of the adjusted linear model (red) and the adjusted model, modelling exposure as a natural spline with 5 degrees of freedom (blue dashed line), for exposure to  $OP_v^{AA}$  and lung function at 6 weeks. P-value is from the likelihood-ratio test. Summary table available in the Excel supplemental file. The green lines represent the thresholds for 1<sup>st</sup> and 99<sup>th</sup> percentile of outcome and exposure.

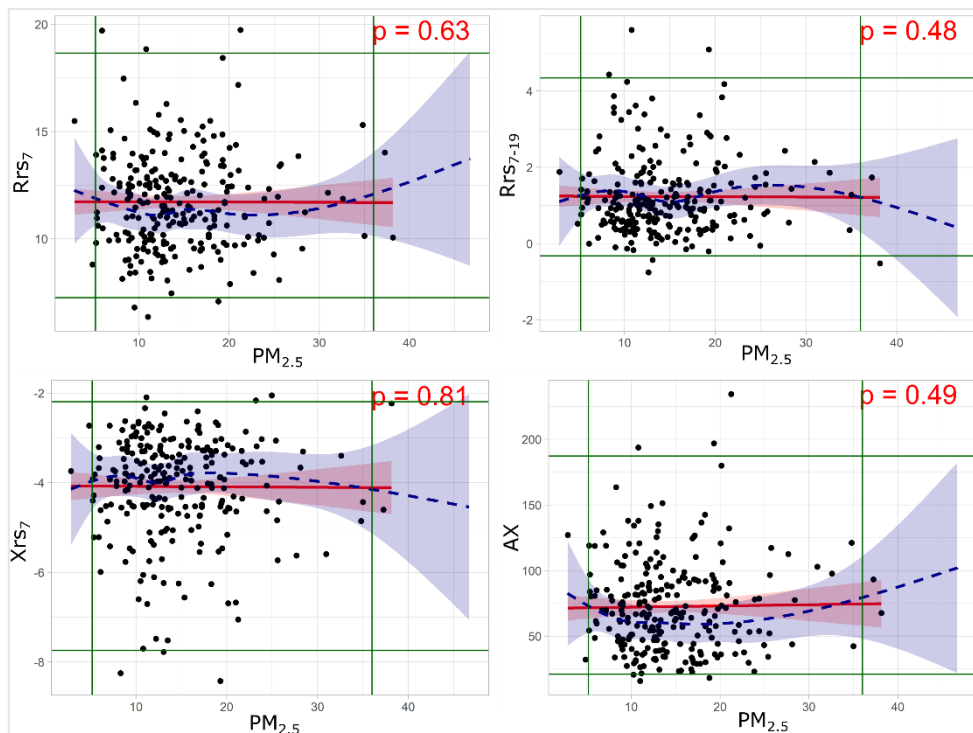

Figure S4. Test of linearity of the  $PM_{2.5}$ -lung function parameters at 3 years.

Comparison of the adjusted linear model (red) and the adjusted model, modelling exposure as a natural spline with 5 degrees of freedom (blue dashed line), for exposure to  $PM_{2.5}$  and lung function at 3 years. P-value is from the likelihood-ratio test. Summary table available in the Excel supplemental file. The green lines represent the thresholds for 1<sup>st</sup> and 99<sup>th</sup> percentile of outcome and exposure.

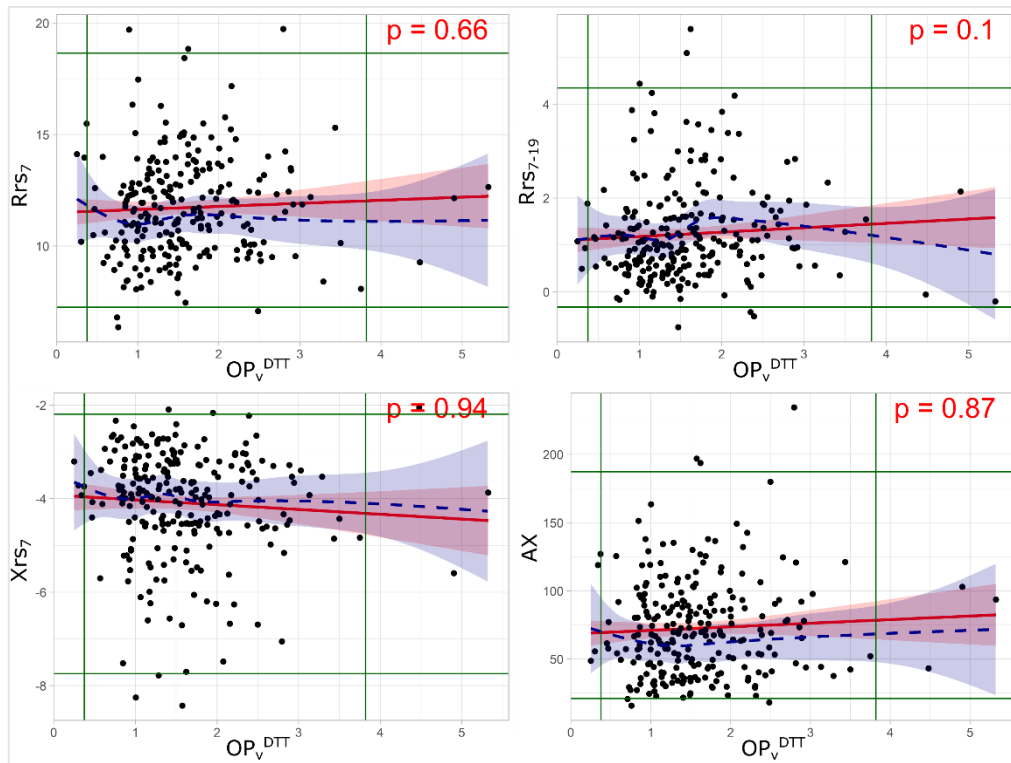

Figure S5. Test of linearity of the  $OP_v^{DTT}$ -lung function parameters at 3 years. Comparison of the adjusted linear model (red) and the adjusted spline with 5 degrees of freedom (blue dashed line), for exposure to  $OP_v^{DTT}$  and lung function at 3 years. P-value is from the likelihood-ratio test. Summary table available in the Excel supplemental file. The green lines represent the thresholds for 1<sup>st</sup> and 99<sup>th</sup> percentile of outcome and exposure.

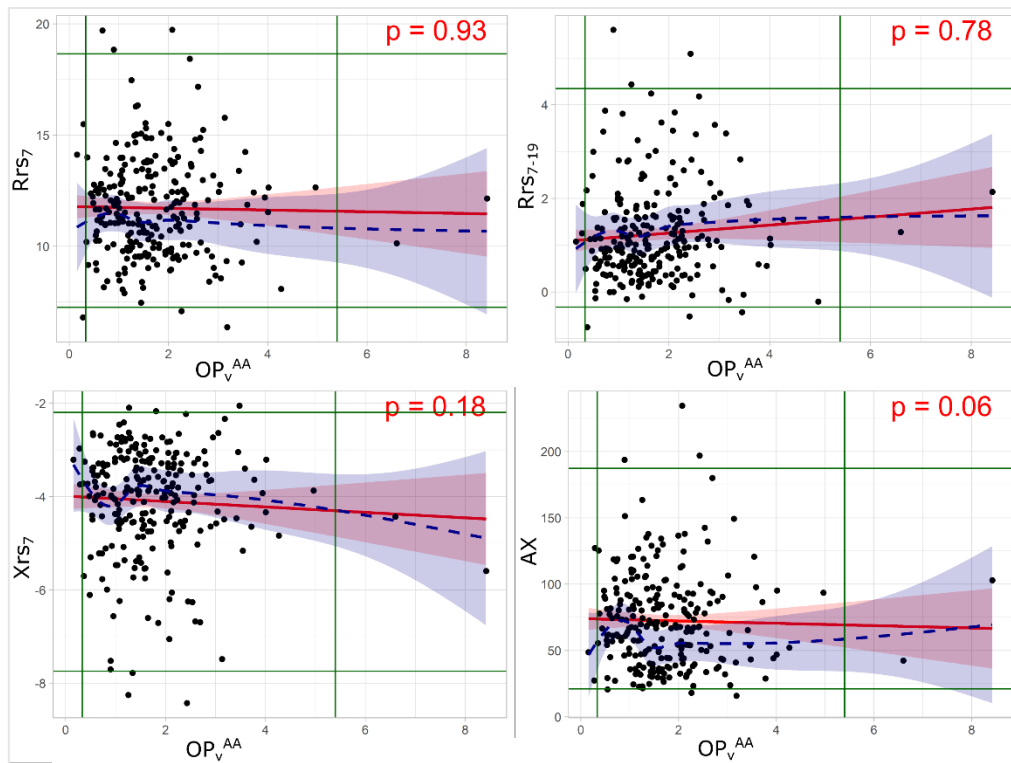

Figure S6. Test of linearity of the  $OP_v^{AA}$ -lung function parameters at 3 years. Comparison of the adjusted linear model (red) and the adjusted spline with 5 degrees of freedom (blue dashed line), for exposure to  $OP_v^{AA}$  and lung function at 3 years. P-value is from the likelihood-ratio test. Summary table available in the Excel supplemental file. The green lines represent the thresholds for 1<sup>st</sup> and 99<sup>th</sup> percentile of outcome and exposure.

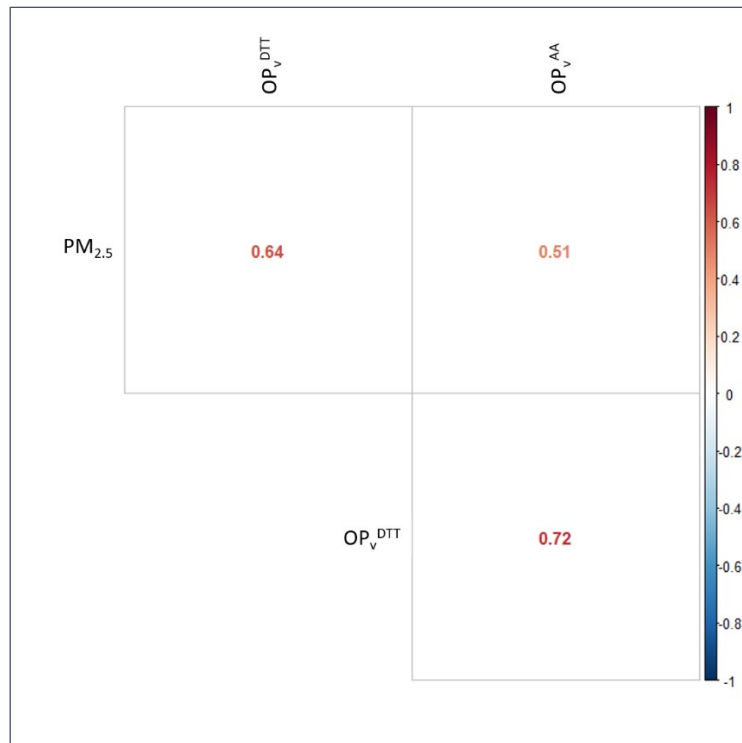

Figure S7. Spearman correlation coefficients between the exposures.  $PM_{2.5}$ , particulate matter with an aerodynamic diameter  $<2.5 \mu\text{m}$ ;  $OP_v^{AA}$ , volume-normalised oxidative potential measured by the AA assay;  $OP_v^{DTT}$ , volume-normalised oxidative potential measured by the DTT assay

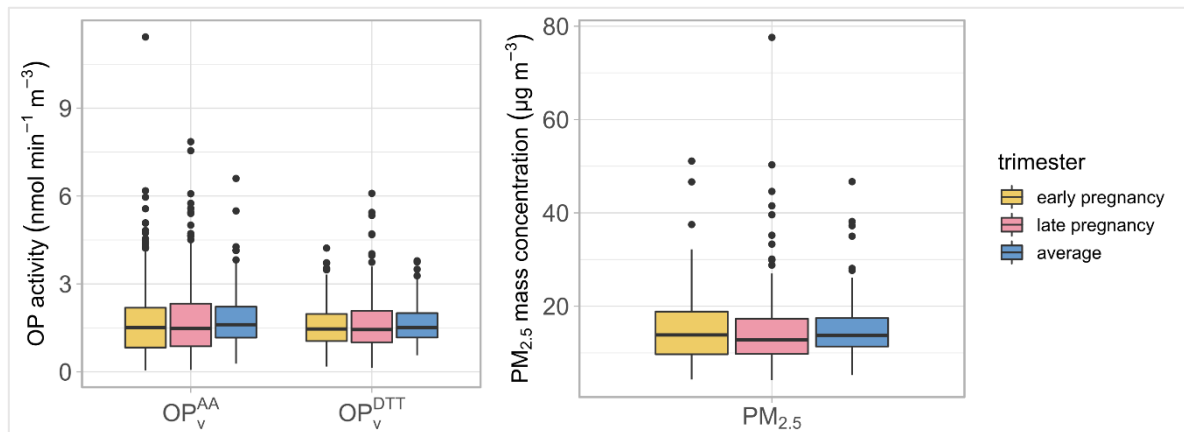

Figure S8. Comparison of the distribution of personal measurements of  $OP_v^{AA}$  (left),  $OP_v^{DTT}$  (center) and  $PM_{2.5}$  (right) during each week of sampling, and their average. See Table S3 for corresponding numeric data.

Note: Boxes represent 25<sup>th</sup> to 75<sup>th</sup> percentiles, the middle horizontal line represents the median, whiskers extend to the most extreme point within 1.5 interquartile ranges of the box and the dots outside boxes indicate outliers.  $PM_{2.5}$ , particulate matter with an aerodynamic diameter  $<2.5 \mu\text{m}$ ;  $OP_v^{AA}$ , volume-normalised oxidative potential measured by the AA assay;  $OP_v^{DTT}$ , volume-normalised oxidative potential measured by the DTT assay.

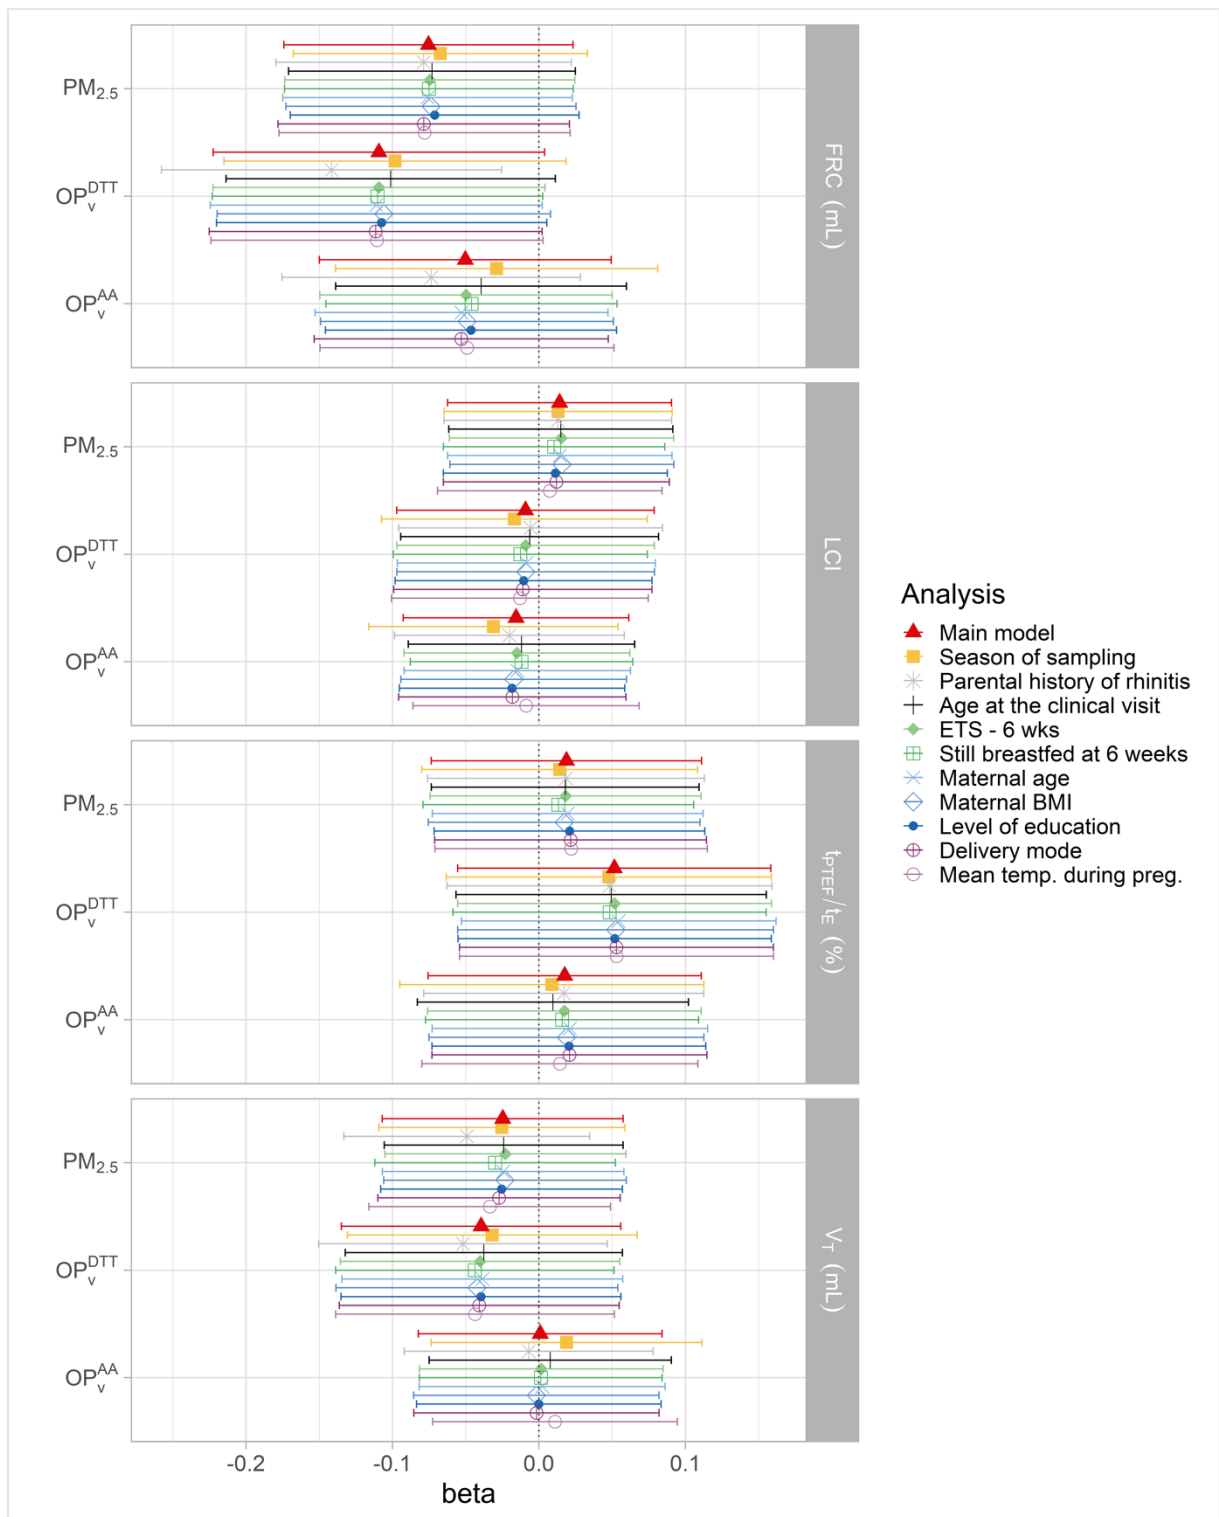

Figure S9. Effect of each confounder separately on the regression models at 6 weeks, adjusted for sex, height and weight, and comparison to the main model, adjusted on all the confounders listed.

Outcomes and exposures were scaled by their IQR. See Excel supplemental file for corresponding numeric data. Whiskers represent the 95% confidence interval around the estimate.  $PM_{2.5}$ , particulate matter with an aerodynamic diameter  $<2.5 \mu m$  ( $\mu g m^{-3}$ );  $OP_v^{DTT}$ , volume-normalised oxidative potential measured by the DTT assay ( $nmol min^{-1} m^{-3}$ );  $OP_v^{AA}$ , volume-normalised oxidative potential measured by the AA assay ( $nmol min^{-1} m^{-3}$ ); FRC, functional residual capacity; LCI, lung clearance index;  $V_T$ , tidal volume;  $t_{PTEF}/t_E$  ratio of time to peak tidal expiratory flow to expiratory time.

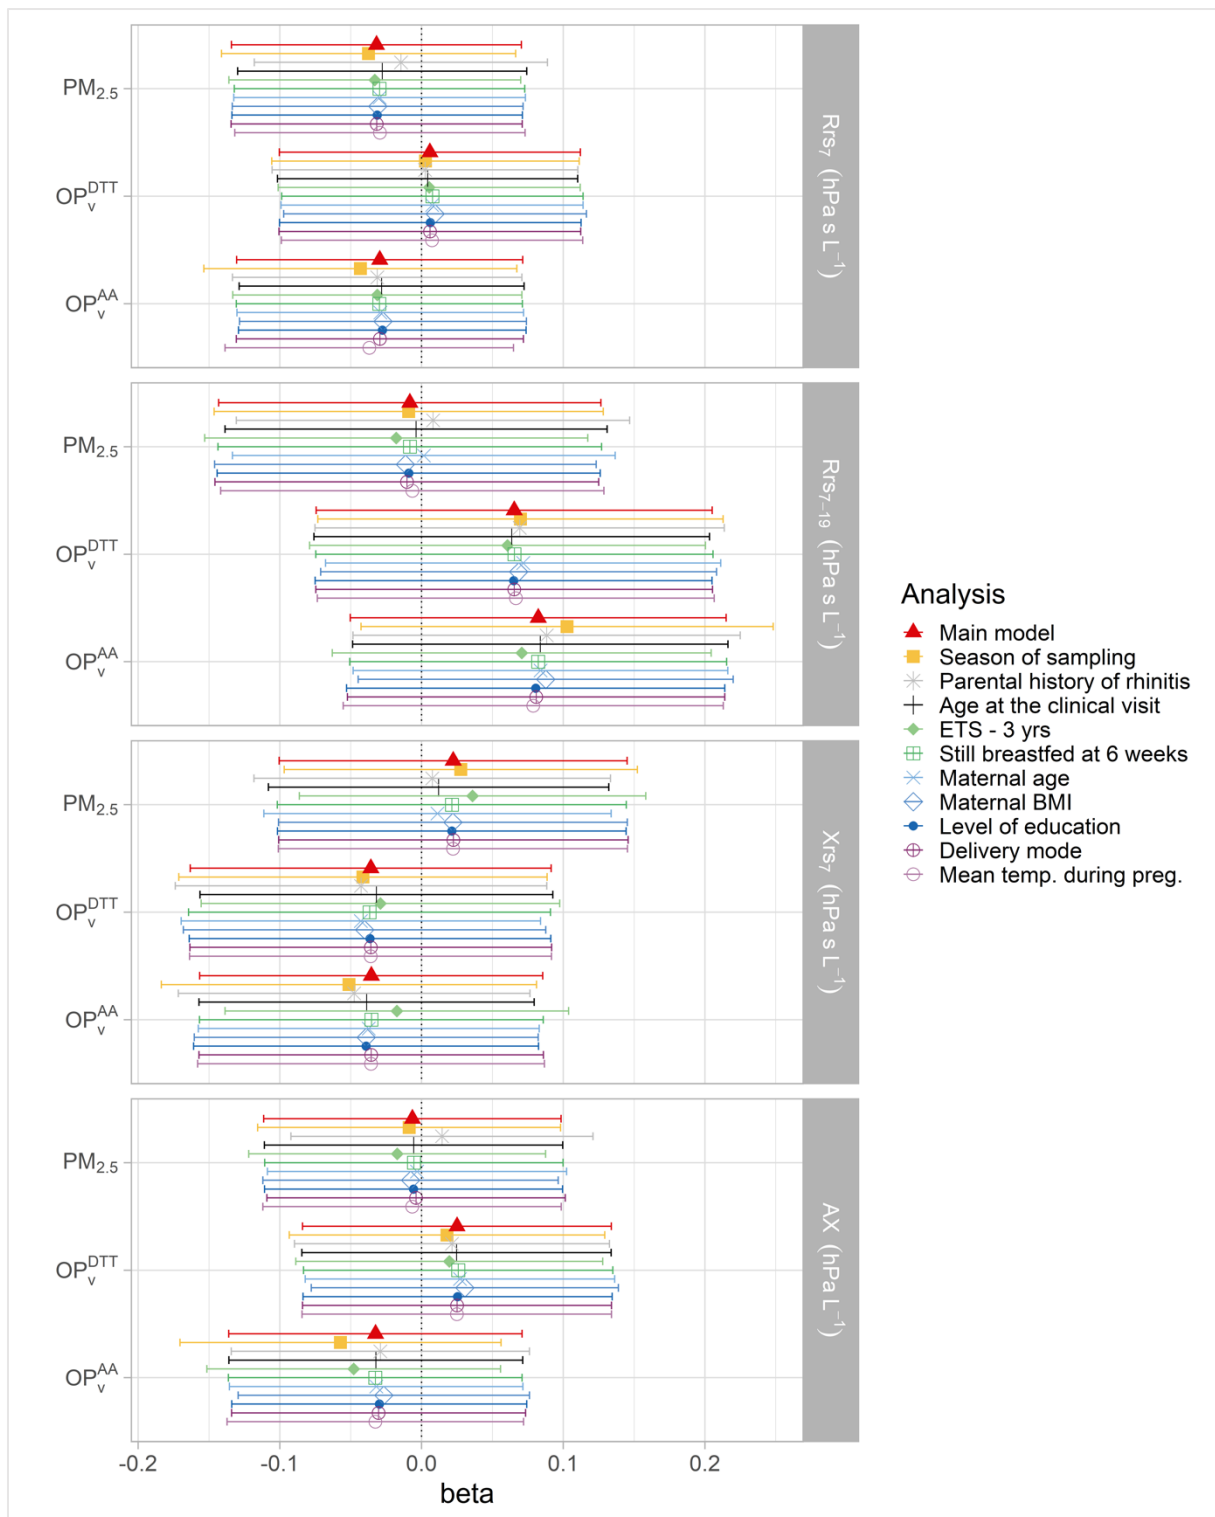

Figure S10. Effect of each confounder separately on the regression models at 3 years, adjusted for sex, height and weight, and comparison to the main model, adjusted on all the confounders listed.

Outcomes and exposures were scaled by their IQR. See Table S3 for corresponding numeric data. Whiskers represent the 95% confidence interval around the estimate.  $PM_{2.5}$ , particulate matter with an aerodynamic diameter  $<2.5 \mu\text{m}$  ( $\mu\text{g m}^{-3}$ );  $OP_v^{DTT}$ , volume-normalised oxidative potential measured by the DTT assay ( $\text{nmol min}^{-1} \text{m}^{-3}$ );  $OP_v^{AA}$ , volume-normalised oxidative potential measured by the AA assay ( $\text{nmol min}^{-1} \text{m}^{-3}$ );  $Rrs_7$ , resistance at a frequency of 7 Hz;  $Rrs_{7-19}$ , difference between the resistance at 7 Hz and at 19 Hz;  $Xrs_7$ , reactance at a frequency of 7 Hz;  $AX$ , area under the reactance curve.

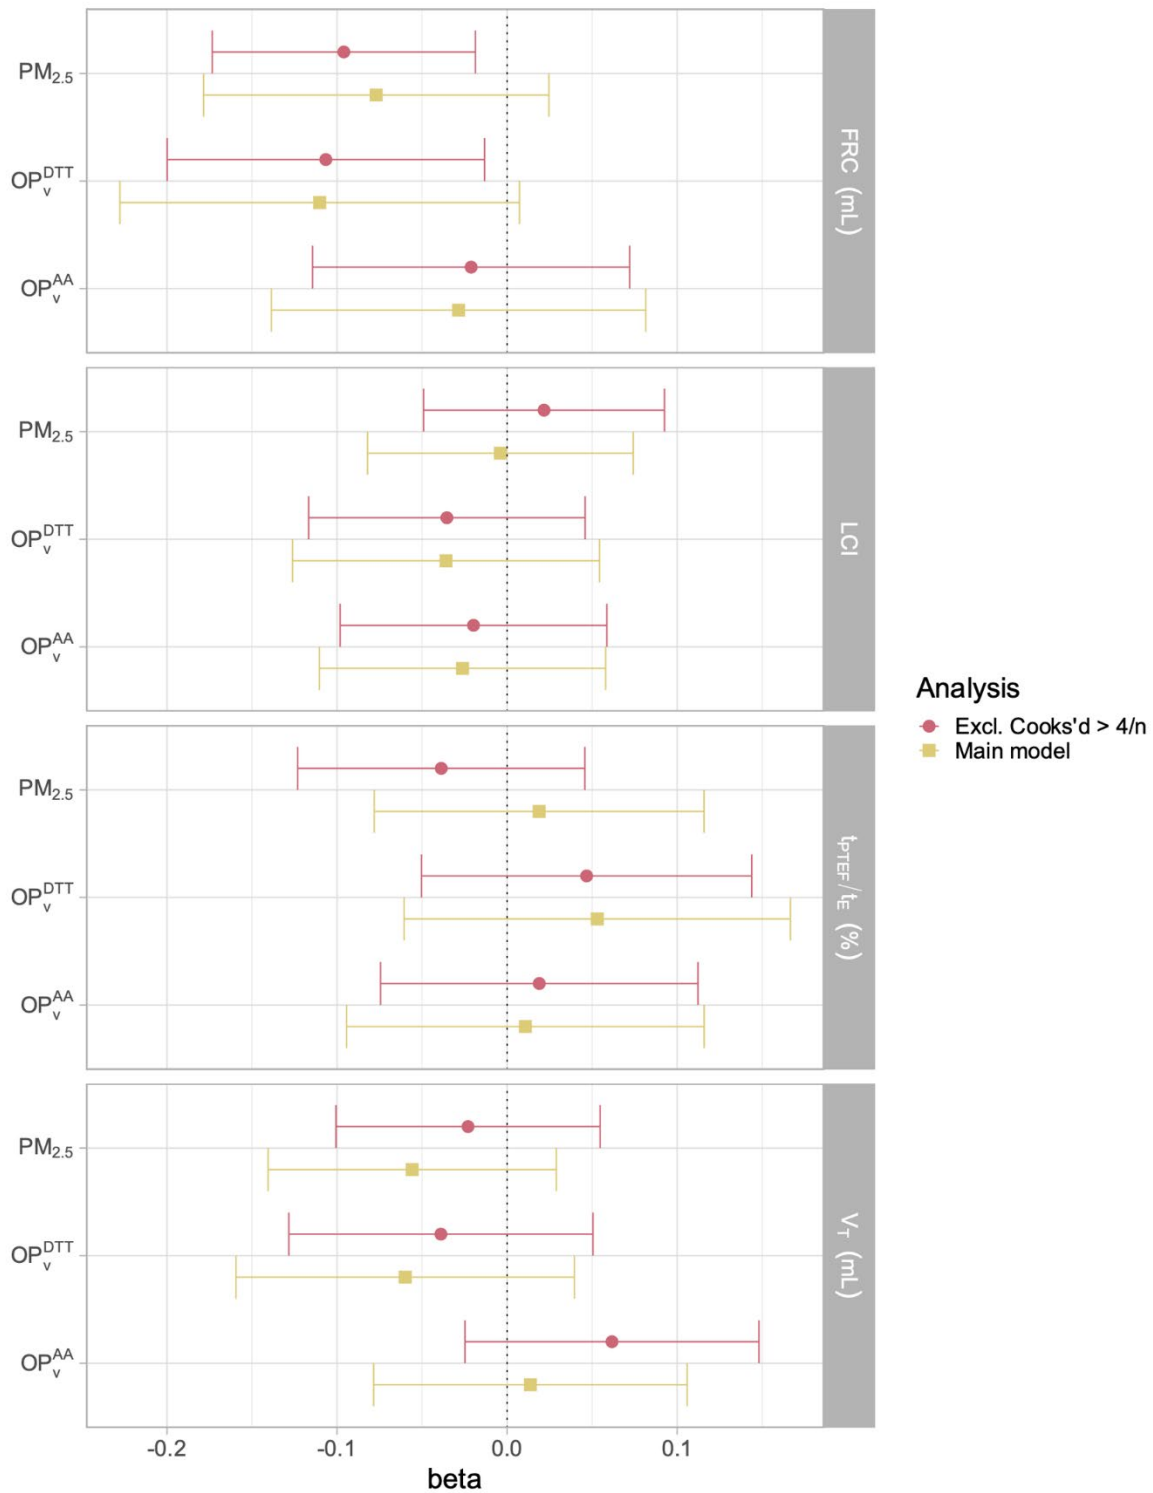

Figure S11. Association between personal exposure to  $PM_{2.5}$ ,  $OP_v^{DTT}$  and  $OP_v^{AA}$  during pregnancy and lung function parameters measured at 6 weeks in the multiple linear models and in the sensitivity analysis excluding leverage and influencing points, estimated by Cook's distance.

Outcomes and exposures were scaled by their IQR. See Table S4 for corresponding numeric data. Whiskers represent the 95% confidence interval around the estimate. Models were adjusted on child's height, weight, sex, age, season of sampling, breastfeeding, environmental tobacco smoke, maternal age and BMI before pregnancy, parental level of education, parental history of rhinitis and mean temperature during pregnancy.  $PM_{2.5}$ , particulate matter with an aerodynamic diameter  $< 2.5 \mu m$  ( $\mu g m^{-3}$ );  $OP_v^{DTT}$ , volume-normalised oxidative potential measured by the DTT assay ( $nmol min^{-1} m^{-3}$ );  $OP_v^{AA}$ , volume-normalised oxidative potential measured by the AA assay ( $nmol min^{-1} m^{-3}$ ); FRC, functional residual capacity; LCI, lung clearance index;  $V_T$ , tidal volume;  $1PTEF/1E$  ratio of time to peak tidal expiratory flow to expiratory time.



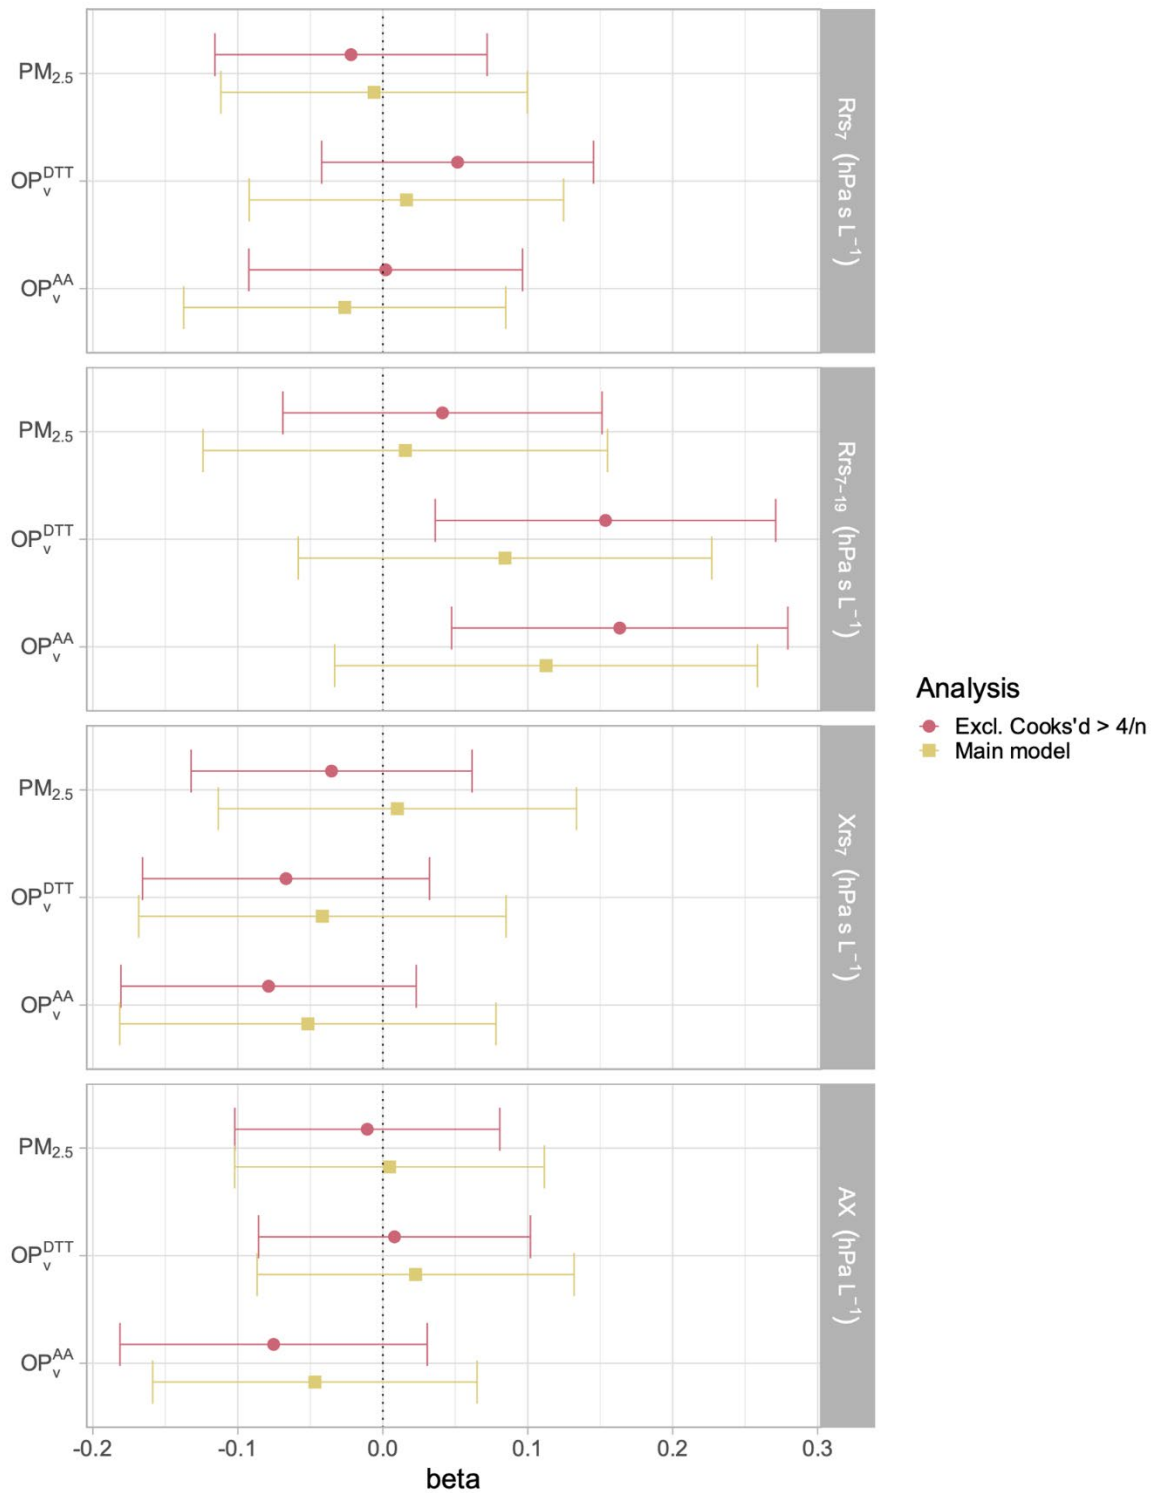

Figure S12. Association between personal exposure to  $PM_{2.5}$ ,  $OP_v^{DTT}$  and  $OP_v^{AA}$  during pregnancy and lung function parameters measured at 3 years in the multiple linear models and in the sensitivity analysis excluding leverage and influencing points, estimated by Cook's distance.

Outcomes and exposures were scaled by their IQR. See Table S5 for corresponding numeric data. Whiskers represent the 95% confidence interval around the estimate. Model were adjusted on child's height, weight, sex, age, season of sampling, breastfeeding, environmental tobacco smoke, maternal age and BMI before pregnancy, parental level of education, parental history of rhinitis and mean temperature during pregnancy.  $PM_{2.5}$ , particulate matter with an aerodynamic diameter  $<2.5 \mu m$  ( $\mu g m^{-3}$ );  $OP_v^{DTT}$ , volume-normalised oxidative potential measured by the DTT assay ( $nmol min^{-1} m^{-3}$ );  $OP_v^{AA}$ , volume-normalised oxidative potential measured by the AA assay ( $nmol min^{-1} m^{-3}$ );  $Rrs_7$ , resistance at a frequency of 7 Hz;  $Rrs_{7-19}$ , difference between the resistance at 7 Hz and at 19 Hz;  $Xrs_7$ , reactance at a frequency of 7 Hz;  $AX$ , area under the reactance curve.
